# Supplementary material for: Planar tetracoordinate carbon species CLi3E with 12-valence-electrons
Source: Royal Society of Chemistry journal article supplement (doi:10.1039/c5cp06081h), 2016-01-01
Supplement: c5cp06081h1.pdf [file c5cp06081h1.pdf]

## Electronic Supplementary Material

### Planar tetracoordinate carbon species $\text{CLi}_3\text{E}$ with 12- valence-electron<sup>†</sup>

Jiayi Guo<sup>a</sup>, Haoyu Chai<sup>a</sup>, Qian Duan<sup>a</sup>, Jieming Qin<sup>a</sup>, Xiande Shen<sup>a</sup>,  
Dayong Jiang<sup>a</sup>, Jianhua Hou<sup>\*a</sup>, Bing Yan<sup>b</sup>, Zhiru Li<sup>c</sup>, Fenglong Gu<sup>\*d</sup> and  
Qianshu Li<sup>\*d</sup>

*a. School of Materials Science and Engineering, Changchun University  
of Science and Technology, Changchun 130022, People's Republic of  
China*

*b. Institute of Atomic and Molecular Physics, Jilin University,  
Changchun 130012, People's Republic of China.*

*c. Institute of Theoretical Chemistry, Jilin University, Changchun  
130012, People's Republic of China.*

*d. Center for Computational Quantum Chemistry, South China Normal  
University, Guangzhou 510631, People's Republic of China 130012,  
People's Republic of China.*

<sup>†</sup>All of these calculations are carried out using the Gaussian 09 program<sup>1</sup>.

## 1 Figures and Tables

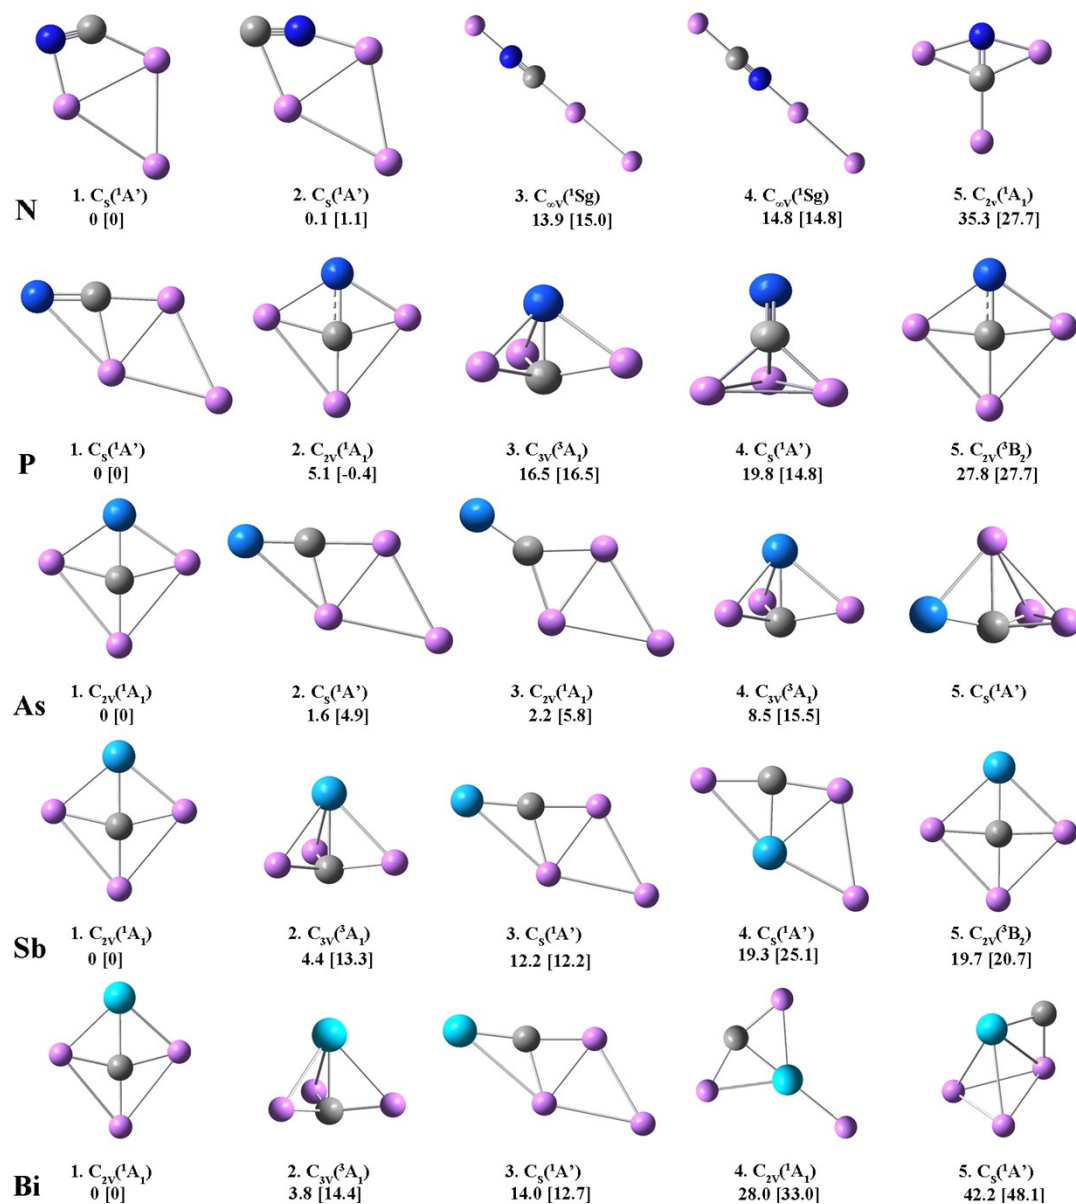

**Figure S1.** Local minima for the  $CL_3E$  ( $E = N, P, As, Sb, Bi$ ) clusters. The energy differences in kcal/mol are computed at the CCSD(T)/aug-cc-pVTZ//B3LYP/aug-cc-pVTZ level. The values in square brackets are obtained at the MP2/aug-cc-pVTZ//B3LYP/aug-cc-pVTZ level.

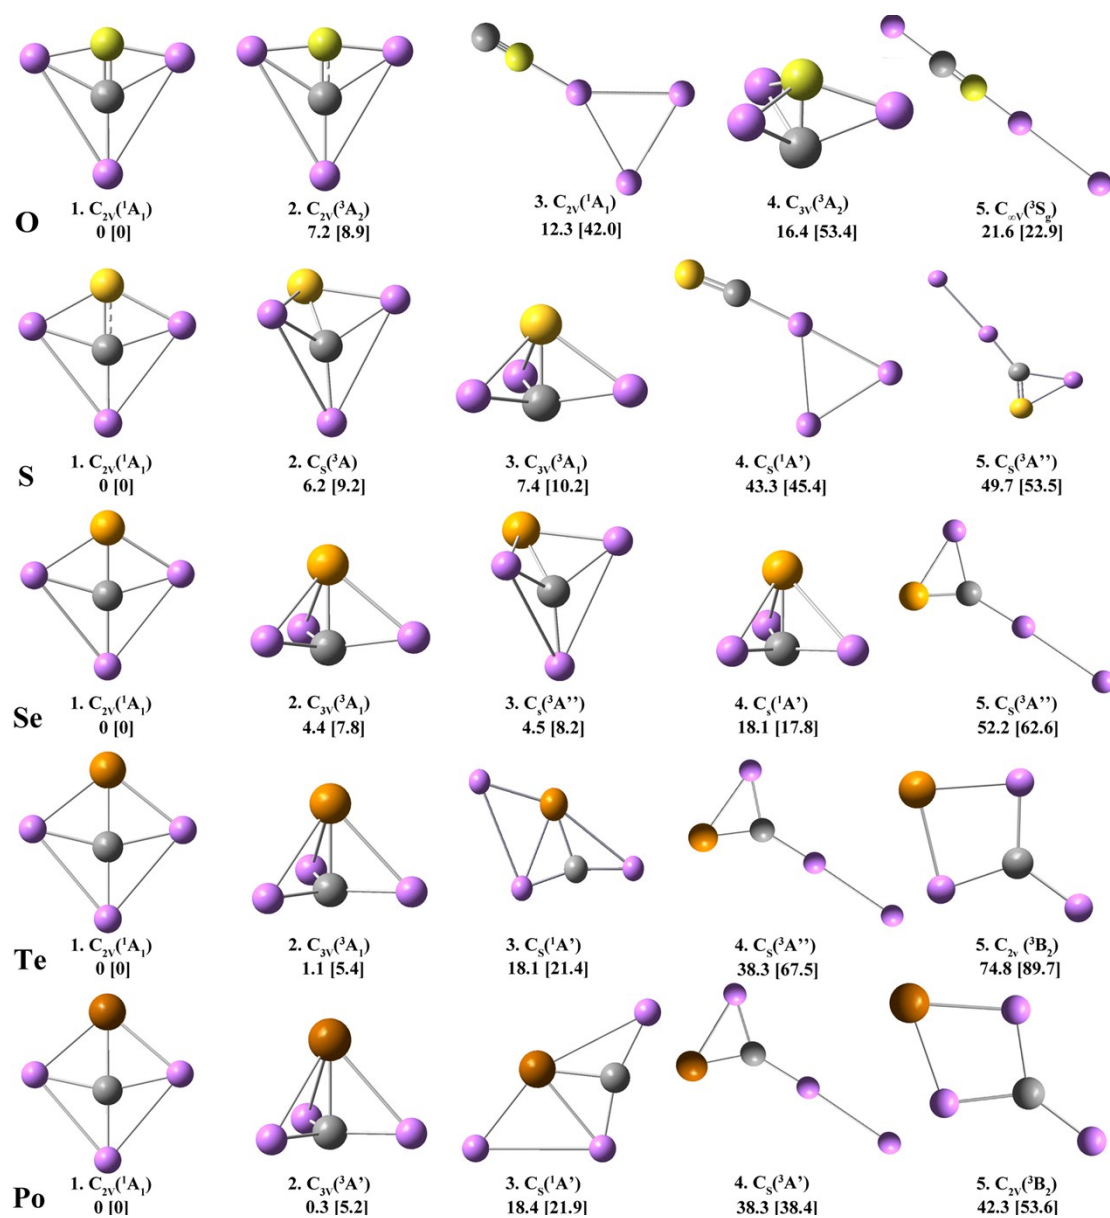

**Figure S2.** Local minima for the  $CLi_3E^+$  ( $E = O, S, Se, Te, Po$ ) clusters. The energy differences in kcal/mol are computed at the CCSD(T)/aug-cc-pVTZ//B3LYP/aug-cc-pVTZ level. The values in square brackets are obtained at the MP2/aug-cc-pVTZ//B3LYP/aug-cc-pVTZ level.

**2 Cartesian coordinates of all the ptC species optimized at MP2/aug-cc-pVTZ level.**

**$C_{2v}$  CLi<sub>3</sub>N**

|    |            |             |             |
|----|------------|-------------|-------------|
| C  | 0.00000000 | 0.00000000  | -0.34322000 |
| Li | 0.00000000 | 1.85916000  | 0.41351900  |
| Li | 0.00000000 | -1.85916000 | 0.41351900  |
| Li | 0.00000000 | 0.00000000  | -2.25392600 |
| N  | 0.00000000 | 0.00000000  | 0.90571200  |

**$C_{2v}$  CLi<sub>3</sub>P**

|    |            |             |             |
|----|------------|-------------|-------------|
| C  | 0.00000000 | 0.00000000  | -0.76885500 |
| Li | 0.00000000 | 1.95632300  | -0.25823000 |
| Li | 0.00000000 | -1.95632300 | -0.25823000 |
| Li | 0.00000000 | 0.00000000  | -2.66715800 |
| P  | 0.00000000 | 0.00000000  | 0.94426600  |

**$C_{2v}$  CLi<sub>3</sub>As**

|    |            |             |             |
|----|------------|-------------|-------------|
| C  | 0.00000000 | 0.00000000  | -1.20512400 |
| Li | 0.00000000 | 1.95975300  | -0.70836000 |
| Li | 0.00000000 | -1.95975300 | -0.70836000 |
| Li | 0.00000000 | 0.00000000  | -3.09819900 |
| As | 0.00000000 | 0.00000000  | 0.62956100  |

**$C_{2v}$  CLi<sub>3</sub>Sb**

|    |            |             |             |
|----|------------|-------------|-------------|
| C  | 0.00000000 | 0.00000000  | -1.54204800 |
| Li | 0.00000000 | 1.97608000  | -1.10288700 |
| Li | 0.00000000 | -1.97608000 | -1.10288700 |
| Li | 0.00000000 | 0.00000000  | -3.43047900 |
| Sb | 0.00000000 | 0.00000000  | 0.51296200  |

**$C_{2v}$  CLi<sub>3</sub>Bi**

|    |            |             |             |
|----|------------|-------------|-------------|
| C  | 0.00000000 | 0.00000000  | -1.79061900 |
| Li | 0.00000000 | 1.97165100  | -1.35618300 |
| Li | 0.00000000 | -1.97165100 | -1.35618300 |
| Li | 0.00000000 | 0.00000000  | -3.67375700 |

|    |            |            |            |
|----|------------|------------|------------|
| Bi | 0.00000000 | 0.00000000 | 0.36026600 |
|----|------------|------------|------------|

### **$C_{2v}$ CLi<sub>3</sub>O<sup>+</sup>**

|    |            |             |             |
|----|------------|-------------|-------------|
| C  | 0.00000000 | 0.00000000  | -0.43694000 |
| Li | 0.00000000 | 1.80529900  | 0.48227300  |
| Li | 0.00000000 | -1.80529900 | 0.48227300  |
| Li | 0.00000000 | 0.00000000  | -2.35168600 |
| O  | 0.00000000 | 0.00000000  | 0.84788300  |

### **$C_{2v}$ CLi<sub>3</sub>S<sup>+</sup>**

|    |            |             |             |
|----|------------|-------------|-------------|
| C  | 0.00000000 | 0.00000000  | -0.79127500 |
| Li | 0.00000000 | 1.99544200  | -0.17409800 |
| Li | 0.00000000 | -1.99544200 | -0.17409800 |
| Li | 0.00000000 | 0.00000000  | -2.72913100 |
| S  | 0.00000000 | 0.00000000  | 0.87372700  |

### **$C_{2v}$ CLi<sub>3</sub>Se<sup>+</sup>**

|    |            |             |             |
|----|------------|-------------|-------------|
| C  | 0.00000000 | 0.00000000  | -1.20048200 |
| Li | 0.00000000 | 2.01722600  | -0.64605900 |
| Li | 0.00000000 | -2.01722600 | -0.64605900 |
| Li | 0.00000000 | 0.00000000  | -3.14032100 |
| Se | 0.00000000 | 0.00000000  | 0.60294700  |

### **$C_{2v}$ CLi<sub>3</sub>Te<sup>+</sup>**

|    |            |             |             |
|----|------------|-------------|-------------|
| C  | 0.00000000 | 0.00000000  | -1.50764800 |
| Li | 0.00000000 | 2.04375000  | -1.07075400 |
| Li | 0.00000000 | -2.04375000 | -1.07075400 |
| Li | 0.00000000 | 0.00000000  | -3.44939600 |
| Te | 0.00000000 | 0.00000000  | 0.49651200  |

### **$C_{2v}$ CLi<sub>3</sub>Po<sup>+</sup>**

|    |            |             |             |
|----|------------|-------------|-------------|
| C  | 0.00000000 | 0.00000000  | -1.74731700 |
| Li | 0.00000000 | 2.04016700  | -1.33727600 |
| Li | 0.00000000 | -2.04016700 | -1.33727600 |
| Li | 0.00000000 | 0.00000000  | -3.68516200 |
| Po | 0.00000000 | 0.00000000  | 0.35194100  |

**3 Cartesian coordinates and energies (hartree) of all the low-lying isomers calculated at MP2/aug-cc-pVTZ and CCSD(T)/aug-cc-pVTZ level.**

**CLi<sub>3</sub>N**

**1 MP2=-115.11547939 , CCSD(T)= -115.12713556**

|    |             |             |            |
|----|-------------|-------------|------------|
| C  | 0.00000000  | 1.02457000  | 0.00000000 |
| Li | -0.76970900 | -1.10438100 | 0.00000000 |
| Li | 1.65697600  | -2.89788500 | 0.00000000 |
| Li | 1.78443500  | 0.07444400  | 0.00000000 |
| N  | -1.14501500 | 0.80515000  | 0.00000000 |

**2 MP2=-115.11373476 , CCSD(T)= -115.12697324**

|    |             |             |            |
|----|-------------|-------------|------------|
| C  | -1.14023200 | 1.11277500  | 0.00000000 |
| Li | -0.79453600 | -1.05893700 | 0.00000000 |
| Li | 1.44368900  | -3.05058000 | 0.00000000 |
| Li | 1.63131100  | -0.09192900 | 0.00000000 |
| N  | 0.00000000  | 0.84681300  | 0.00000000 |

**3 MP2=-115.09155103 , CCSD(T)= -115.10504963**

|    |            |            |             |
|----|------------|------------|-------------|
| C  | 0.00000000 | 0.00000000 | 0.17715600  |
| Li | 0.00000000 | 0.00000000 | 3.14606700  |
| Li | 0.00000000 | 0.00000000 | -4.72942600 |
| Li | 0.00000000 | 0.00000000 | -1.89395100 |
| N  | 0.00000000 | 0.00000000 | 1.33842800  |

**4 MP2=-115.09183506 , CCSD(T)= -115.10354738**

|    |            |            |             |
|----|------------|------------|-------------|
| C  | 0.00000000 | 0.00000000 | 1.32476700  |
| Li | 0.00000000 | 0.00000000 | 3.28640400  |
| Li | 0.00000000 | 0.00000000 | -4.58472900 |
| Li | 0.00000000 | 0.00000000 | -1.74289600 |
| N  | 0.00000000 | 0.00000000 | 0.16786600  |

## 5 MP2=-115.07127564 , CCSD(T)= -115.07079836

|    |            |             |             |
|----|------------|-------------|-------------|
| C  | 0.00000000 | 0.00000000  | -0.34522300 |
| Li | 0.00000000 | 1.83180700  | 0.42924600  |
| Li | 0.00000000 | -1.83180700 | 0.42924600  |
| Li | 0.00000000 | 0.00000000  | -2.22282100 |
| N  | 0.00000000 | 0.00000000  | 0.88061800  |

## CLi<sub>3</sub>P

### 1 MP2=-401.2868546 , CCSD(T)= -401.30357879

|    |             |             |            |
|----|-------------|-------------|------------|
| C  | 0.00000000  | 0.53779500  | 0.00000000 |
| Li | 1.20001100  | -1.18298100 | 0.00000000 |
| Li | 1.88786400  | 1.25932500  | 0.00000000 |
| Li | 4.13991600  | -0.72052200 | 0.00000000 |
| P  | -1.44555800 | -0.08628300 | 0.00000000 |

### 2 MP2=-401.2875448 , CCSD(T)= -401.29551941

|    |            |             |             |
|----|------------|-------------|-------------|
| C  | 0.00000000 | 0.00000000  | -0.76733000 |
| Li | 0.00000000 | 0.00000000  | -2.62500600 |
| Li | 0.00000000 | 1.91689600  | -0.25818400 |
| Li | 0.00000000 | -1.91689600 | -0.25818400 |
| P  | 0.00000000 | 0.00000000  | 0.93520700  |

### 3 MP2=-401.26057209 , CCSD(T)=-401.27726253

|    |             |             |             |
|----|-------------|-------------|-------------|
| C  | 0.00000000  | 0.00000000  | -1.00479500 |
| Li | 0.00000000  | 1.89516000  | -0.62203600 |
| Li | 1.64125700  | -0.94758000 | -0.62203600 |
| Li | -1.64125700 | -0.94758000 | -0.62203600 |
| P  | 0.00000000  | 0.00000000  | 0.77514000  |

### 4 MP2=-401.2632998 , CCSD(T)=-401.27214448

|    |             |            |             |
|----|-------------|------------|-------------|
| C  | -0.53105100 | 0.40955900 | 0.00000000  |
| Li | -0.53105100 | 1.92588900 | 1.28841800  |
| Li | -0.53105100 | 1.92588900 | -1.28841800 |
| Li | 1.65122800  | 0.77502300 | 0.00000000  |

|   |            |             |            |
|---|------------|-------------|------------|
| P | 0.09459500 | -1.08918400 | 0.00000000 |
|---|------------|-------------|------------|

**5 MP2=-401.24266289 , CCSD(T)=-401.25945422**

|    |            |             |             |
|----|------------|-------------|-------------|
| C  | 0.00000000 | 0.00000000  | -0.67222600 |
| Li | 0.00000000 | 0.00000000  | -2.63014800 |
| Li | 0.00000000 | 1.99779800  | -0.44490800 |
| Li | 0.00000000 | -1.99779800 | -0.44490800 |
| P  | 0.00000000 | 0.00000000  | 0.97288300  |

**CLi<sub>3</sub>As**

**1 MP2=-2294.84663161 , CCSD(T)=-2294.8478539**

|    |            |             |             |
|----|------------|-------------|-------------|
| C  | 0.00000000 | 0.00000000  | -1.21416100 |
| Li | 0.00000000 | 1.91970600  | -0.71523200 |
| Li | 0.00000000 | -1.91970600 | -0.71523200 |
| Li | 0.00000000 | 0.00000000  | -3.06898900 |
| As | 0.00000000 | 0.00000000  | 0.62979800  |

**2 MP2=-2294.83880286 , CCSD(T)=-2294.845381**

|    |             |             |            |
|----|-------------|-------------|------------|
| C  | 0.00000000  | 0.83658500  | 0.00000000 |
| Li | 2.08811300  | 0.63813600  | 0.00000000 |
| Li | 0.68329500  | 2.73884800  | 0.00000000 |
| Li | 3.64873600  | 3.17316900  | 0.00000000 |
| As | -0.58365000 | -0.74757500 | 0.00000000 |

**3 MP2=-2294.83739487 , CCSD(T)=-2294.8443272**

|    |            |             |             |
|----|------------|-------------|-------------|
| C  | 0.00000000 | 0.00000000  | -0.67723800 |
| Li | 0.00000000 | 1.22418400  | -2.32370500 |
| Li | 0.00000000 | -1.22418400 | -2.32370500 |
| Li | 0.00000000 | 0.00000000  | -5.04424400 |
| As | 0.00000000 | 0.00000000  | 1.00419400  |

**4 MP2=-2294.82185274 , CCSD(T)=-2294.8342519**

|    |            |            |             |
|----|------------|------------|-------------|
| C  | 0.00000000 | 0.00000000 | -1.40211600 |
| Li | 0.00000000 | 1.89860100 | -1.02651900 |



|    |             |             |             |
|----|-------------|-------------|-------------|
| Li | 1.64423700  | -0.94930100 | -1.02651900 |
| Li | -1.64423700 | -0.94930100 | -1.02651900 |
| As | 0.00000000  | 0.00000000  | 0.53489000  |

**5 MP2=-2294.82130825 , CCSD(T)= -2294.8191534**

|    |             |             |             |
|----|-------------|-------------|-------------|
| C  | 0.35640700  | -1.02456300 | 0.00000000  |
| Li | -1.83229500 | -0.86759200 | 0.00000000  |
| Li | 0.08611400  | -2.45757800 | 1.30564200  |
| Li | 0.08611400  | -2.45757800 | -1.30564200 |
| As | 0.08611400  | 0.71198900  | 0.00000000  |

**CLi<sub>3</sub>Sb**

**1 MP2=-299.87549989 , CCSD(T)= -299.87466922**

|    |            |             |             |
|----|------------|-------------|-------------|
| C  | 0.00000000 | 0.00000000  | -1.56225900 |
| Li | 0.00000000 | 1.93270000  | -1.11228400 |
| Li | 0.00000000 | -1.93270000 | -1.11228400 |
| Li | 0.00000000 | 0.00000000  | -3.41913100 |
| Sb | 0.00000000 | 0.00000000  | 0.51577800  |

**2 MP2=-299.85428355 , CCSD(T)= -299.86769554**

|    |             |             |             |
|----|-------------|-------------|-------------|
| C  | 0.00000000  | 0.00000000  | -1.71082600 |
| Li | 0.00000000  | 1.90938200  | -1.43852700 |
| Li | -1.65357300 | -0.95469100 | -1.43852700 |
| Li | 1.65357300  | -0.95469100 | -1.43852700 |
| Sb | 0.00000000  | 0.00000000  | 0.45513100  |

**3 MP2=-299.85606308 , CCSD(T)= -299.85522290**

|    |             |             |            |
|----|-------------|-------------|------------|
| C  | -0.48281500 | -1.09152300 | 0.00000000 |
| Li | 1.25020100  | -2.25625000 | 0.00000000 |
| Li | 0.86962800  | -5.21180400 | 0.00000000 |
| Li | -1.15419800 | -2.99465400 | 0.00000000 |
| Sb | 0.00000000  | 0.74386800  | 0.00000000 |

**4 MP2=-299.84250941 , CCSD(T)= -299.84383812**

|    |            |            |             |
|----|------------|------------|-------------|
| C  | 0.00000000 | 0.00000000 | -1.45835900 |
| Li | 0.00000000 | 2.00384700 | -1.37316100 |

|    |            |             |             |
|----|------------|-------------|-------------|
| Li | 0.00000000 | -2.00384700 | -1.37316100 |
| Li | 0.00000000 | 0.00000000  | -3.43084400 |
| Sb | 0.00000000 | 0.00000000  | 0.53493400  |

**5 MP2=-299.8354918, CCSD(T)= -299.84331976**

|    |             |             |            |
|----|-------------|-------------|------------|
| C  | -0.70345100 | -1.59845100 | 0.00000000 |
| Li | 2.72720200  | 0.61510700  | 0.00000000 |
| Li | -2.50505900 | -0.87466000 | 0.00000000 |
| Li | 1.18476000  | -2.03881000 | 0.00000000 |
| Sb | 0.00000000  | 0.32325100  | 0.00000000 |

**CLi<sub>3</sub>Bi**

**1 MP2=-274.19977095 , CCSD(T)= -274.19112281**

|    |            |             |             |
|----|------------|-------------|-------------|
| C  | 0.00000000 | 0.00000000  | -1.82529300 |
| Li | 0.00000000 | 1.92692400  | -1.37388700 |
| Li | 0.00000000 | -1.92692400 | -1.37388700 |
| Li | 0.00000000 | 0.00000000  | -3.68234600 |
| Bi | 0.00000000 | 0.00000000  | 0.36436300  |

**2 MP2=-274.17675762 , CCSD(T)= -274.18511367**

|    |             |             |             |
|----|-------------|-------------|-------------|
| C  | 0.00000000  | 0.00000000  | -1.96437300 |
| Li | 0.00000000  | 1.90678600  | -1.69169200 |
| Li | 1.65132500  | -0.95339300 | -1.69169200 |
| Li | -1.65132500 | -0.95339300 | -1.69169200 |
| Bi | 0.00000000  | 0.00000000  | 0.32543900  |

**3 MP2= -274.17952321 , CCSD(T)= -274.16876194**

|    |             |             |            |
|----|-------------|-------------|------------|
| C  | -0.45383100 | -1.41255900 | 0.00000000 |
| Li | 1.25059400  | -2.60709300 | 0.00000000 |
| Li | -1.16179800 | -3.30370000 | 0.00000000 |
| Li | 0.81886600  | -5.55874600 | 0.00000000 |
| Bi | 0.00000000  | 0.51667400  | 0.00000000 |

**4 MP2=-274.14726179 , CCSD(T)= -274.14646521**

|    |            |            |             |
|----|------------|------------|-------------|
| C  | 0.00000000 | 0.00000000 | -2.03529600 |
| Li | 0.00000000 | 1.92395200 | -1.66656600 |

|    |            |             |             |
|----|------------|-------------|-------------|
| Li | 0.00000000 | -1.92395200 | -1.66656600 |
| Li | 0.00000000 | 0.00000000  | 2.66696900  |
| Bi | 0.00000000 | 0.00000000  | 0.17120800  |

**5 MP2=-274.12313839 , CCSD(T)= -274.12393112**

|    |             |             |             |
|----|-------------|-------------|-------------|
| C  | -1.82863700 | 0.51953500  | 0.00000000  |
| Li | 0.19734500  | -2.54726400 | 1.40088400  |
| Li | 0.19734500  | -2.54726400 | -1.40088400 |
| Li | -2.19729900 | -1.40348800 | 0.00000000  |
| Bi | 0.19734500  | 0.19731100  | 0.00000000  |

**CLi<sub>3</sub>O<sup>+</sup>**

**1 MP2=-135.37767509 , CCSD(T)= -135.3830797**

|    |            |             |             |
|----|------------|-------------|-------------|
| C  | 0.00000000 | 0.00000000  | -0.44161400 |
| Li | 0.00000000 | 1.77088600  | 0.49415800  |
| Li | 0.00000000 | -1.77088600 | 0.49415800  |
| Li | 0.00000000 | 0.00000000  | -2.32589500 |
| O  | 0.00000000 | 0.00000000  | 0.83280200  |

**2 MP2=-135.36354341 , CCSD(T)= -135.37156308**

|    |            |             |             |
|----|------------|-------------|-------------|
| C  | 0.00000000 | 0.00000000  | -0.50962100 |
| Li | 0.00000000 | 1.77917100  | 0.63509600  |
| Li | 0.00000000 | -1.77917100 | 0.63509600  |
| Li | 0.00000000 | 0.00000000  | -2.37867000 |
| O  | 0.00000000 | 0.00000000  | 0.79789500  |

**3 MP2=-135.31074054 , CCSD(T)= -135.36349093**

|    |            |             |             |
|----|------------|-------------|-------------|
| C  | 0.00000000 | 0.00000000  | 2.30302500  |
| Li | 0.00000000 | 0.00000000  | -0.84556100 |
| Li | 0.00000000 | 1.44938500  | -3.43887500 |
| Li | 0.00000000 | -1.44938500 | -3.43887500 |
| O  | 0.00000000 | 0.00000000  | 1.16897200  |

**4 MP2=-135.29254697 , CCSD(T)= -135.35697997**

|    |            |            |             |
|----|------------|------------|-------------|
| C  | 0.00000000 | 0.00000000 | -0.80310300 |
| Li | 0.00000000 | 1.82048200 | 0.02687500  |

|    |             |             |            |
|----|-------------|-------------|------------|
| Li | -1.57658400 | -0.91024100 | 0.02687500 |
| Li | 1.57658400  | -0.91024100 | 0.02687500 |
| O  | 0.00000000  | 0.00000000  | 0.57209200 |

**5 MP2=-135.34115471 , CCSD(T)= -135.34861376**

|    |            |            |             |
|----|------------|------------|-------------|
| C  | 0.00000000 | 0.00000000 | 1.34362000  |
| Li | 0.00000000 | 0.00000000 | -1.63819000 |
| Li | 0.00000000 | 0.00000000 | 3.26550200  |
| Li | 0.00000000 | 0.00000000 | -4.70902200 |
| O  | 0.00000000 | 0.00000000 | 0.14792700  |

**CLi<sub>3</sub>S<sup>+</sup>**

**1 MP2=-457.96778659 , CCSD(T)= -457.98629122**

|    |            |             |             |
|----|------------|-------------|-------------|
| C  | 0.00000000 | 0.00000000  | -0.79847300 |
| Li | 0.00000000 | 1.95983300  | -0.17522000 |
| Li | 0.00000000 | -1.95983300 | -0.17522000 |
| Li | 0.00000000 | 0.00000000  | -2.70457200 |
| S  | 0.00000000 | 0.00000000  | 0.87224200  |

**2 MP2=-457.95306653 , CCSD(T)= -457.97633253**

|    |             |             |             |
|----|-------------|-------------|-------------|
| C  | 0.63244100  | 0.54911100  | 0.00000000  |
| Li | -0.50914200 | 0.78527100  | 1.72609500  |
| Li | -0.50914200 | 0.78527100  | -1.72609500 |
| Li | 2.46882900  | 1.13655700  | 0.00000000  |
| S  | -0.50914200 | -0.71349800 | 0.00000000  |

**3 MP2=-457.95145623 , CCSD(T)= -457.97455564**

|    |             |             |             |
|----|-------------|-------------|-------------|
| C  | 0.00000000  | 0.00000000  | -1.00116800 |
| Li | 0.00000000  | 1.97592800  | -0.65955000 |
| Li | -1.71120400 | -0.98796400 | -0.65955000 |
| Li | 1.71120400  | -0.98796400 | -0.65955000 |
| S  | 0.00000000  | 0.00000000  | 0.74643500  |

**4 MP2=-457.89547652 , CCSD(T)= -457.91731023**

|    |             |             |            |
|----|-------------|-------------|------------|
| C  | 0.00000000  | 0.42583900  | 0.00000000 |
| Li | 1.12784100  | -3.89315600 | 0.00000000 |
| Li | 1.60520700  | -0.93794400 | 0.00000000 |
| Li | 3.85144500  | -2.97664000 | 0.00000000 |
| S  | -1.23459300 | 1.30426100  | 0.00000000 |

**5 MP2=-457.88256106 , CCSD(T)= -457.90701558**

|    |             |             |            |
|----|-------------|-------------|------------|
| C  | 0.00000000  | 0.34317200  | 0.00000000 |
| Li | 1.84017100  | 1.22060200  | 0.00000000 |
| Li | -1.97589000 | 1.03421800  | 0.00000000 |
| Li | 4.70089400  | 2.39571800  | 0.00000000 |
| S  | -0.85597000 | -1.00066500 | 0.00000000 |

**CLi<sub>3</sub>Se<sup>+</sup>****1 MP2=-2460.35341802, CCSD(T)= -2460.3656015**

|    |            |             |             |
|----|------------|-------------|-------------|
| C  | 0.00000000 | 0.00000000  | -1.22004100 |
| Li | 0.00000000 | 1.98260100  | -0.65418400 |
| Li | 0.00000000 | -1.98260100 | -0.65418400 |
| Li | 0.00000000 | 0.00000000  | -3.13025900 |
| Se | 0.00000000 | 0.00000000  | 0.60694500  |

**2 MP2=-2460.3410236 , CCSD(T)= -2460.3586293**

|    |             |             |             |
|----|-------------|-------------|-------------|
| C  | 0.00000000  | 0.00000000  | -1.37108400 |
| Li | 0.00000000  | 1.98710600  | -1.10177400 |
| Li | 1.72088500  | -0.99355300 | -1.10177400 |
| Li | -1.72088500 | -0.99355300 | -1.10177400 |
| Se | 0.00000000  | 0.00000000  | 0.53360200  |

**3 MP2=-2460.3404123 , CCSD(T)= -2460.3583495**

|    |             |             |             |
|----|-------------|-------------|-------------|
| C  | -0.91441800 | -0.86661400 | 0.00000000  |
| Li | -1.24096900 | 0.24833100  | 1.71015800  |
| Li | -1.24096900 | 0.24833100  | -1.71015800 |
| Li | -1.24096900 | -2.78067200 | 0.00000000  |

|    |            |            |            |
|----|------------|------------|------------|
| Se | 0.48986000 | 0.35446200 | 0.00000000 |
|----|------------|------------|------------|

#### 4 MP2=-2460.32512402 , CCSD(T)= -2460.3367163

|    |             |             |             |
|----|-------------|-------------|-------------|
| C  | -0.86120800 | -1.01602800 | 0.00000000  |
| Li | 0.28936600  | -1.85343400 | 1.42910900  |
| Li | 0.28936600  | -1.85343400 | -1.42910900 |
| Li | -2.13580300 | 0.51404300  | 0.00000000  |
| Se | 0.28936600  | 0.46101900  | 0.00000000  |

#### 5 MP2=-2460.25359471 , CCSD(T)= -2460.2824629

|    |             |             |            |
|----|-------------|-------------|------------|
| C  | 0.26829800  | -0.84449100 | 0.00000000 |
| Li | 2.23937000  | -0.17762300 | 0.00000000 |
| Li | -2.14048900 | -5.37605600 | 0.00000000 |
| Li | -0.63547800 | -2.67297800 | 0.00000000 |
| Se | 0.00000000  | 0.87490900  | 0.00000000 |

### CLi<sub>3</sub>Te<sup>+</sup>

#### 1 MP2=-327.47021322 , CCSD(T)= -327.48009553

|    |            |             |             |
|----|------------|-------------|-------------|
| C  | 0.00000000 | 0.00000000  | -1.54192300 |
| Li | 0.00000000 | 2.00525900  | -1.08112500 |
| Li | 0.00000000 | -2.00525900 | -1.08112500 |
| Li | 0.00000000 | 0.00000000  | -3.45845600 |
| Te | 0.00000000 | 0.00000000  | 0.50218600  |

#### 2 MP2=-327.46154049 , CCSD(T)= -327.47829378

|    |             |             |             |
|----|-------------|-------------|-------------|
| C  | 0.00000000  | 0.00000000  | -1.64190724 |
| Li | 0.00000000  | 1.98946714  | -1.56562132 |
| Li | -1.72292908 | -0.99473357 | -1.56562132 |
| Li | 1.72292908  | -0.99473357 | -1.56562132 |
| Te | 0.00000000  | 0.00000000  | 0.46042376  |

#### 3 MP2=-327.4361185 , CCSD(T)= -327.45120596

|    |             |             |            |
|----|-------------|-------------|------------|
| C  | -0.61186600 | -1.62105700 | 0.00000000 |
| Li | -2.59877200 | -1.75865000 | 0.00000000 |
| Li | 1.30260500  | -2.03570900 | 0.00000000 |
| Li | 2.51990000  | 1.20430600  | 0.00000000 |
| Te | 0.00000000  | 0.33647100  | 0.00000000 |

#### 4 MP2=-327.3626956 , CCSD(T)= -327.41908736

|    |             |             |            |
|----|-------------|-------------|------------|
| C  | 1.09643185  | 0.66635021  | 0.00000000 |
| Li | 3.06901986  | 0.16464325  | 0.00000000 |
| Li | 0.08827583  | 2.44888620  | 0.00000000 |
| Li | 6.03872688  | -0.71321971 | 0.00000000 |
| Te | -0.65705113 | -0.18651982 | 0.00000000 |

#### 5 MP2=-327.32720532 , CCSD(T)= -327.36087712

|    |            |             |             |
|----|------------|-------------|-------------|
| C  | 0.00000000 | 0.00000000  | -2.58760200 |
| Li | 0.00000000 | 1.71350300  | -1.36272800 |
| Li | 0.00000000 | -1.71350300 | -1.36272800 |
| Li | 0.00000000 | 0.00000000  | -4.59579900 |
| Te | 0.00000000 | 0.00000000  | 0.72095000  |

### CLi<sub>3</sub>Po<sup>+</sup>

#### 1 MP2=-297.18711105 , CCSD(T)= -297.19116548

|    |            |             |             |
|----|------------|-------------|-------------|
| C  | 0.00000000 | 0.00000000  | -1.79726700 |
| Li | 0.00000000 | 2.00312800  | -1.35910800 |
| Li | 0.00000000 | -2.00312800 | -1.35910800 |
| Li | 0.00000000 | 0.00000000  | -3.71540300 |
| Po | 0.00000000 | 0.00000000  | 0.35814800  |

#### 2 MP2=-297.17875468 , CCSD(T)= -297.19067815

|    |             |             |             |
|----|-------------|-------------|-------------|
| C  | 0.00000000  | 0.00000000  | -1.87950800 |
| Li | 0.00000000  | 1.98450900  | -1.83753700 |
| Li | -1.71863500 | -0.99225400 | -1.83753700 |
| Li | 1.71863500  | -0.99225400 | -1.83753700 |
| Po | 0.00000000  | 0.00000000  | 0.33113000  |

### 3 MP2=-297.15226955 , CCSD(T)= -297.16181715

|    |             |             |            |
|----|-------------|-------------|------------|
| C  | -0.64491400 | -1.81602900 | 0.00000000 |
| Li | 2.65991600  | 0.95943300  | 0.00000000 |
| Li | 1.26412800  | -2.25540200 | 0.00000000 |
| Li | -2.63421700 | -1.93846200 | 0.00000000 |
| Po | 0.00000000  | 0.24523200  | 0.00000000 |

### 4 MP2=-297.12592932 , CCSD(T)= -297.13008136

|    |             |             |            |
|----|-------------|-------------|------------|
| C  | -0.41865900 | -1.53893700 | 0.00000000 |
| Li | -2.40016200 | -1.09193500 | 0.00000000 |
| Li | 0.70184400  | -3.23691600 | 0.00000000 |
| Li | 2.53563700  | -5.73177700 | 0.00000000 |
| Po | 0.00000000  | 0.46923200  | 0.00000000 |

### 5 MP2=-297.10167757 , CCSD(T)= -297.123804

|    |            |             |             |
|----|------------|-------------|-------------|
| C  | 0.00000000 | 0.00000000  | -3.25195900 |
| Li | 0.00000000 | 1.50443200  | -1.70609900 |
| Li | 0.00000000 | -1.50443200 | -1.70609900 |
| Li | 0.00000000 | 0.00000000  | -5.26272500 |
| Po | 0.00000000 | 0.00000000  | 0.54210100  |

1. M. J. Frisch, G. W. Trucks, H. B. Schlegel, G. E. Scuseria, M. A. Robb, J. R. Cheeseman, G. Scalmani, V. Barone, B. Mennucci, G. A. Petersson, H. Nakatsuji, M. Caricato, X. Li, H. P. Hratchian, A. F. Izmaylov, J. Bloino, G. Zheng, J. L. Sonnenberg, M. Hada, M. Ehara, K. Toyota, R. Fukuda, J. Hasegawa, M. Ishida, T. Nakajima, Y. Honda, O. Kitao, H. Nakai, T. Vreven, J. A. Montgomery, Jr., J. E. Peralta, F. Ogliaro, M. Bearpark, J. J. Heyd, E. Brothers, K. N. Kudin, V. N. Staroverov, R. Kobayashi, J. Normand, K. Raghavachari, A. Rendell, J. C. Burant, S. S. Iyengar, J. Tomasi, M. Cossi, N. Rega, J. M. Millam, M. Klene, J. E. Knox, J. B. Cross, V. Bakken, C. Adamo, J. Jaramillo, R. Gomperts, R. E. Stratmann, O. Yazyev, A. J. Austin, R. Cammi, C. Pomelli, J.W. Ochterski, R. L.Martin, K.Morokuma, V. G. Zakrzewski, G. A. Voth, P. Salvador, J. J. Dannenberg, S. Dapprich, A. D. Daniels, O. Farkas, J. B. Foresman, J. V. Ortiz, J. Cioslowski and D. J. Fox, Gaussian 09, Revision D.01, Gaussian, Inc., Wallingford CT, 2009.
